# Supplementary material for: Microsecond pulsed electric fields induce myocardial ablation by damaging mitochondria
Source: Research Square preprint supplement (doi:10.21203/rs.3.rs-5296354/v1), 2024-11-28
Supplement: Supplementary file 1 [file 2a3e7707bb6c8b4e4b5185cf.docx]

**Supplement Table 1. Antibody information**

| Antibody name | Specimens | Company | Product No. | Dilution ratio |
| --- | --- | --- | --- | --- |
| Cytochrome C Polyclonal Antibody | mouse/pig/rat | proteintech | 10993-1-AP | 1/200 |
| SLC25A24 Polyclonal Antibody | mouse/pig | proteintech | 14669-1-AP | 1/200 |
| Cleaved Caspase-3 (Asp175) (5A1E) Rabbit mAb | mouse/pig | CST | 9664 | 1/1000 |
| Recombinant Anti-NFkB p105/p50 antibody[E381] | mouse/pig | abcam | ab32360 | 1/500 |
| AKT Monoclonal antibody | rat | proteintech | 60203-2-Ig | 1/10000 |
| Phospho-AKT (Ser473) Recombinant antibody | rat | proteintech | 80455-1-RR | 1/10000 |
| PI3 Kinase p110 Beta Polyclonal antibody | rat | proteintech | 20584-1-AP | 1/1000 |
| IKBKB Polyclonal Antibody | rat | proteintech | 15649-1-AP | 1/1000 |
| NFKB1 Polyclonal antibody | rat | proteintech | 14220-1-AP | 1/1000 |
| Bcl-XL Polyclonal antibody | rat | proteintech | 26967-1-AP | 1/1000 |
| Beta Actin Recombinant antibody | rat | proteintech | 81115-1-RR | 1/10000 |

**Supplement Table 2. Primer information**

| NCBI Reference Sequence | **Gene** | **Primer** | **Sequence (5'-3')** |
| --- | --- | --- | --- |
| ENSRNOG00000031979 | ATP6 | Forward | CAGCAAACATTACAGCAGGC |
| Reverse | TCATGTAGGTACAGGCTTAC |
| ENSRNOG00000030371 | COX2 | Forward | AGGTGAACTTCGTCTATTAG |
| Reverse | CATAGAATAGACCTGGTCGG |
| ENSRNOG00000031033 | ND2 | Forward | CTGCTCAACCCTATCAACAC |
| Reverse | TAAGGGTACTTAATACTGTG |
| ENSRNOG00000055079 | Ndufaf2 | Forward | CCTACTATGGAGGAAATACT |
| Reverse | CTGGCACCCAGGATCCTGGC |
| ENSRNOG00000048174 | Uqcrq | Forward | TGATCTCCTACAGCTTGTCG |
| Reverse | TCACTTGTCATTCTCGTACT |
| ENSRNOG00000031766 | CYTB | Forward | TGCATACTTCAAAACAACGC |
| Reverse | AGATTGGTATGAGAATGAGG |
| ENSRNOG00000003897 | Col1a1 | Forward | AACGAGATCGAGCTCAGGGG |
| Reverse | CCTGGTCTGGGGCACCAATG |
| ENSRNOG00000017392 | Fgf2 | Forward | GGAAGATGGACGGCTGCTGG |
| Reverse | ATTGGAAGAAACAGTATGGC |
| ENSRNOG00000018903 | Pik3r1 | Forward | TGCTCTGTAGTGGTAGATGG |
| Reverse | CGCCTCTGTTGTGCATATAC |
| ENSRNOG00000045829 | Thbs1 | Forward | TGCGCACCCTGTGGCATGAC |
| Reverse | ACGAACAGGCCTAGTCTACC |
| ENSRNOG00000007159 | Ccl2 | Forward | CCAGAACCAAGTGAGATCAG |
| Reverse | CTAGTTCTCTGTCATACTGG |
| ENSRNOG00000020811 | Il6r | Forward | AAGCCAGAGTCATTCAGAGC |
| Reverse | TTGCCGAGTAGACCTCATAG |
